# Supplementary material for: Genetic analysis of L123 of the tRNA-mimicking eukaryote release factor eRF1, an amino acid residue critical for discrimination of stop codons
Source: PubMed Central journal article supplement (PMC4482090; doi:10.1093/nar/gkv376), 2015-04-20

## SUPPLEMENTARY

### **Genetic analysis of L123 of the tRNA-mimicking eukaryote release factor eRF1, an amino acid residue critical for discrimination of stop codons**

Kazuki Saito<sup>1</sup> and Koichi Ito<sup>1\*</sup>

<sup>1</sup>Department of Medical Genome Sciences, Graduate School of Frontier Sciences, The University of Tokyo, Kashiwa-city, Chiba 277-8562, Japan

\* To whom correspondence should be addressed. Tel: +81 4 7136 3600; Fax: +81 4 7136 3601; Email: itokoichi@k.u-tokyo.ac.jp

## SUPPLEMENTARY TABLE AND FIGURES LEGENDS

**Table S1.** Yeast strains used in this study.

**Table S2.** Primers used for construction of yeast expression plasmids.

**Table S3.** Readthrough frequencies of comprehensive Sc-eRF1 L123 mutants.

**Table S4.** Summary of the readthrough frequencies of Hs-eRF1 L126 mutants in various conditions.

**Table S5.** Readthrough frequencies of Hs-eRF1 mutants other than L126.

**Table S6.** Readthrough frequencies of selected Sc-eRF1 L123 mutants.

**Figure S1. Structural presentation of the position-123 residues in the various crystal structures of eRF1 (aRF1).** The domain N of various eRF1s with relevant amino acid residues are shown using the previously reported apo- and complexed forms of eRF1/aRF1 (apo-form of *Aeropyrum pernix* aRF1 (pdb id:3AGK), aRF1 in an aEF1A-bound complex (pdb id:3VMF), apo-form of *Homo sapiens* eRF1 [pdb id: 1DT9], human eRF1 in an eRF3-bound complex [pdb id: 3E1Y]). In all structures, the position-123 residue is shown in purple, and residues that contain putative stop codon-binding pockets (T29, E52, V68, Y122, and C124, in *Saccharomyces cerevisiae* numbering) are shown in yellow. Structural models were rendered by MolFeat version 3.5 (Fiatlux, Tokyo).

**Figure S2. Western blot analysis of cellular protein levels of Myc-tagged Sc-eRF1 wild type (WT) and L123 mutants.** Protein expression levels of Myc-tagged Sc-eRF1 variants in the assay strain were monitored by western blot analysis using an anti-myc antibody (Sigma–Aldrich, St Louis, MO, USA). Cellular levels of endogenous PGK1 were monitored as loading control, using an anti-PGK antibody (Invitrogen, Carlsbad, CA, USA). Yeast transformant cells were collected and precipitated with 10% trichloroacetic acid, suspended in SDS sample buffer, neutralized with 5 N NaOH solution, and vigorously mixed with glass beads on the FastPrep 24 instrument (MP Biomedicals, Santa Ana, CA, USA). Proteins in the cell extracts were separated by SDS-PAGE, transferred to polyvinylidene fluoride membranes, and detected using the appropriate antibodies and an enhanced chemiluminescence western blot detection system (GE Healthcare, Little Chalfont, UK).

**Table S1**  
**Yeast strains used in this study**

| Name    | Genotype                                                                                                                                                                                                                                                                                                              | Reference |
|---------|-----------------------------------------------------------------------------------------------------------------------------------------------------------------------------------------------------------------------------------------------------------------------------------------------------------------------|-----------|
| S13-I01 | <i>MAT<math>\alpha</math> ura3-1 ade2-1 leu2-3,112 sal4-2</i> (eRF1ts) <i>HO::kanMX-Rluc-[UAA]-Luc2</i>                                                                                                                                                                                                               | (49)      |
| S13-I03 | <i>MAT<math>\alpha</math> ura3-1 ade2-1 leu2-3,112 sal4-2</i> (eRF1ts) <i>HO::kanMX-Rluc-[UAG]-Luc2</i>                                                                                                                                                                                                               | (49)      |
| S13-I05 | <i>MAT<math>\alpha</math> ura3-1 ade2-1 leu2-3,112 sal4-2</i> (eRF1ts) <i>HO::kanMX-Rluc-[UGA]-Luc2</i>                                                                                                                                                                                                               | (49)      |
| S13-I07 | <i>MAT<math>\alpha</math> ura3-1 ade2-1 leu2-3,112 sal4-2</i> (eRF1ts) <i>HO::kanMX-Rluc-[UGG]-Luc2</i>                                                                                                                                                                                                               | (49)      |
| S13-D09 | <i>MAT<math>\alpha</math> ade2<math>\Delta</math>::hisG his3<math>\Delta</math>200 leu2<math>\Delta</math>0 lys2<math>\Delta</math>0 met15<math>\Delta</math>0 trp1<math>\Delta</math>63 ura3<math>\Delta</math>0 tTA-tetO</i> (YBR143C/SUP45)::hphMX4                                                                | (26)      |
| Y138    | <i>MAT<math>\alpha</math> ade2<math>\Delta</math>::hisG his3<math>\Delta</math>200 leu2<math>\Delta</math>0 lys2<math>\Delta</math>0 met15<math>\Delta</math>0 trp1<math>\Delta</math>63 ura3<math>\Delta</math>0 SUP35::HIS3</i> <i>HO::tTA-tetO</i> (YDR172W/SUP35)::kanMX4 <i>tTA-tetO</i> (YBR143C/SUP45)::hphMX4 | (36)      |
| SKY81   | <i>MAT<math>\alpha</math> ura3-1 ade2-1 leu2-3,112 sal4-2</i> (eRF1ts) <i>HO::CaURA3-R luc-[UAA]-Luc2</i>                                                                                                                                                                                                             | This work |
| SKY82   | <i>MAT<math>\alpha</math> ura3-1 ade2-1 leu2-3,112 sal4-2</i> (eRF1ts) <i>HO::CaURA3-Rluc-[UAG]-Luc2</i>                                                                                                                                                                                                              | This work |
| SKY83   | <i>MAT<math>\alpha</math> ura3-1 ade2-1 leu2-3,112 sal4-2</i> (eRF1ts) <i>HO::CaURA3-Rluc-[UGA]-Luc2</i>                                                                                                                                                                                                              | This work |
| SKY84   | <i>MAT<math>\alpha</math> ura3-1 ade2-1 leu2-3,112 sal4-2</i> (eRF1ts) <i>HO::CaURA3-Rluc-[UGG]-Luc2</i>                                                                                                                                                                                                              | This work |
| SKY106  | <i>MAT<math>\alpha</math> ura3-1 ade2-1 leu2-3,112 sal4-2</i> (eRF1ts) <i>HO::kanMX-Rluc-[UAA]-Luc2</i> <i>tTA-tetO-SUP35</i> (eRF3 <sup>+</sup> )                                                                                                                                                                    | This work |
| SKY107  | <i>MAT<math>\alpha</math> ura3-1 ade2-1 leu2-3,112 sal4-2</i> (eRF1ts) <i>HO::kanMX-Rluc-[UAG]-Luc2</i> <i>tTA-tetO-SUP35</i> (eRF3 <sup>+</sup> )                                                                                                                                                                    | This work |
| SKY108  | <i>MAT<math>\alpha</math> ura3-1 ade2-1 leu2-3,112 sal4-2</i> (eRF1ts) <i>HO::kanMX-Rluc-[UGA]-Luc2</i> <i>tTA-tetO-SUP35</i> (eRF3 <sup>+</sup> )                                                                                                                                                                    | This work |
| SKY109  | <i>MAT<math>\alpha</math> ura3-1 ade2-1 leu2-3,112 sal4-2</i> (eRF1ts) <i>HO::kanMX-Rluc-[UGG]-Luc2</i> <i>tTA-tetO-SUP35</i> (eRF3 <sup>+</sup> )                                                                                                                                                                    | This work |

**Table S2**  
**Primers used for construction of yeast expression plasmids**

| Name of Primers        | Sequences                                          | Restriction site<br>(Underlined in<br>sequence) |
|------------------------|----------------------------------------------------|-------------------------------------------------|
| Sc-eRF1N <sup>*1</sup> | 5'- <u>GGGATCC</u> ATATGGATAACGAGGTTGAAAAA-3'      | <i>Bam</i> HI                                   |
| Sc-eRF1C <sup>*1</sup> | 5'-GGGTCGACTTAAATGAAATCATAGTCAGATCC-3'             | <i>Sal</i> I                                    |
| Hs-eRF1N               | 5'- <u>GGAATTC</u> CATATGGCGGACGACCCAGTGC-3'       | <i>Eco</i> RI                                   |
| Hs-eRF1C               | 5'- <u>GGGTCGAC</u> CTAGTAGTCATCAAGGTCAAAAAATTC-3' | <i>Sal</i> I                                    |
| Hs-eRF3cN              | 5'- <u>GGAATTC</u> CATATGATGGAGGAGGAAGAGGA-3'      | <i>Eco</i> RI                                   |
| Hs-eRF3C               | 5'- <u>GGGTCGAC</u> TCTTAGTCTTTCTCTGGAACCAG-3'     | <i>Sal</i> I                                    |

\*1. "N" and "C" denotes the N- and C-terminal position of the open reading frame, respectively.

**Table S3**  
**Readthrough frequencies of comprehensive Sc-eRF1 L123 mutants.**

| Sc-eRF1<br>Mutation | Readthrough frequency <sup>*1</sup> |            |             |
|---------------------|-------------------------------------|------------|-------------|
|                     | UAA                                 | UAG        | UGA         |
| Vector<br>(p416GPD) | 27.2%                               | 24.6%      | 24.1%       |
| WT                  | 2.6%                                | 2.6%       | 2.4%        |
| L123I               | 3.9% (1.5) <sup>*2</sup>            | 3.5% (1.4) | 14.4% (6.0) |
| L123V               | 2.6%                                | 2.6%       | 7.7%        |
| L123F               | 3.4%                                | 3.7%       | 1.5%        |
| L123A               | 4.8%                                | 7.0%       | 2.4%        |
| L123S               | 4.9%                                | 6.7%       | 2.3%        |
| L123T               | 3.3%                                | 3.8%       | 3.9%        |
| L123C               | 3.4%                                | 3.8%       | 3.1%        |
| L123M               | 3.1%                                | 3.0%       | 3.1%        |
| L123G               | 7.0%                                | 7.2%       | 2.2%        |
| L123D               | 7.5%                                | 5.0%       | 3.7%        |
| L123E               | 5.7%                                | 4.7%       | 6.4%        |
| L123N               | 5.0%                                | 4.1%       | 2.6%        |
| L123Q               | 4.4%                                | 5.4%       | 3.4%        |
| L123R               | 2.5%                                | 3.2%       | 1.3%        |
| L123K               | 2.7%                                | 3.3%       | 1.6%        |
| L123H               | 4.0%                                | 3.1%       | 1.9%        |
| L123Y               | 3.2%                                | 3.4%       | 1.9%        |
| L123W               | 4.0%                                | 2.9%       | 3.0%        |
| L123P               | 28.8%                               | 27.7%      | 21.9%       |

\*1. Readthrough frequencies are indicated as mean from three independent measurements. The assay strains S13-I01, S13-I03, S13-I05, and S13-I07 (Table S5) were used.

\*2 Fold-changes to the wild type values are rounded to the first decimal place are shown in parentheses.

**Table S4****Summary of the readthrough frequencies of Hs-eRF1 L126 mutants under various conditions**

| Hs-eRF1 Mutation <sup>*1</sup> | Additional condition <sup>*2</sup> | Readthrough frequency <sup>*3</sup> |       |       | Fold-change <sup>*6</sup> |     |                          |
|--------------------------------|------------------------------------|-------------------------------------|-------|-------|---------------------------|-----|--------------------------|
|                                |                                    | UAA                                 | UAG   | UGA   | UAA                       | UAG | UGA                      |
| WT                             | Sc-eRF3 <sup>*4</sup>              | 5.0%                                | 3.9%  | 5.2%  | 1.3                       | (1) | 1.3                      |
|                                | Hs-eRF3c <sup>*5</sup>             | 7.2%                                | 4.9%  | 7.4%  | 1.5                       | (1) | 1.5                      |
| L126I                          | Sc-eRF3                            | 5.5%                                | 4.6%  | 11.2% | 1.2                       | (1) | <b>2.4</b> <sup>*7</sup> |
|                                | Hs-eRF3c                           | 7.6%                                | 6.2%  | 25.1% | 1.2                       | (1) | <b>4.1</b>               |
| L126V                          | Sc-eRF3                            | 6.1%                                | 4.8%  | 10.0% | 1.3                       | (1) | <b>2.1</b>               |
|                                | Hs-eRF3c                           | 8.5%                                | 6.2%  | 21.5% | 1.4                       | (1) | <b>3.4</b>               |
| L126F                          | Sc-eRF3                            | 6.8%                                | 5.6%  | 5.3%  | <b>1.3</b>                | 1.1 | (1)                      |
|                                | Hs-eRF3c                           | 11.3%                               | 8.2%  | 6.1%  | <b>1.9</b>                | 1.4 | (1)                      |
| L126A                          | Sc-eRF3                            | 25.4%                               | 16.3% | 10.8% | <b>2.4</b>                | 1.5 | (1)                      |
|                                | Hs-eRF3c                           | 11.8%                               | 11.2% | 4.5%  | <b>2.6</b>                | 2.5 | (1)                      |
| L126S                          | Sc-eRF3                            | 9.3%                                | 9.1%  | 4.0%  | <b>2.3</b>                | 2.3 | (1)                      |
|                                | Hs-eRF3c                           | 15.0%                               | 15.0% | 4.8%  | <b>3.1</b>                | 3.1 | (1)                      |

\*1. Wild type and mutant Hs-eRF1s were expressed from the p416GPD (URA3 marker) expression vector in the case of “with Sc-eRF3” or from the p415GPD (LEU2 marker) in the case of “Hs-eRF3c” and “+paromomycin (with Hs-eRF3c)”.

\*2. The assay strains S13-I01, I03, I05, I07 (for additional condition; Sc-eRF3c), SKY106-109 (for additional condition; Hs-eRF3c), SKY143-146 (for additional condition; paromomycin) were used.

\*3. Readthrough frequencies are indicated as the mean from three independent measurements.

\*4. Sc-eRF3 is expressed from the endogenous wild type SUP35 gene in the strains S13-I01, I03, I05, and I07.

\*5. Hs-eRF3 is expressed from the p416GPD (URA3 marker) expression vector. The endogenous Sc-eRF3 is downregulated in the presence of tetracycline (150 mM).

\*6 Fold-changes to selected stop codon, shown as (1), are rounded to the first decimal place.

\*7. Values cited in Fig.3AB are shown in boldface.

**Table S5**  
**Readthrough frequencies of Hs-eRF1 mutants other than L126**

| Hs-eRF1 Mutation <sup>*1</sup> | Additional condition <sup>*2</sup> | Readthrough frequency <sup>*3</sup> |       |       | Fold-change <sup>*6</sup> |            |            |
|--------------------------------|------------------------------------|-------------------------------------|-------|-------|---------------------------|------------|------------|
|                                |                                    | UAA                                 | UAG   | UGA   | UAA                       | UAG        | UGA        |
| T32A                           | Sc-eRF3 <sup>*4</sup>              | 20.4%                               | 26.0% | 12.8% | 1.6                       | <b>2.0</b> | (1)        |
|                                | Hs-eRF3c <sup>*5</sup>             | 26.7%                               | 29.3% | 18.0% | 1.5                       | <b>1.6</b> | (1)        |
| E55A                           | Sc-eRF3                            | 7.1%                                | 21.4% | 11.4% | (1)                       | <b>3.0</b> | 1.6        |
|                                | Hs-eRF3c                           | 10.1%                               | 27.6% | 17.3% | (1)                       | <b>2.7</b> | 1.7        |
| V71L                           | Sc-eRF3                            | 17.7%                               | 19.9% | 41.9% | (1)                       | 1.1        | <b>2.4</b> |
|                                | Hs-eRF3c                           | 21.4%                               | 27.0% | 49.9% | (1)                       | 1.3        | <b>2.3</b> |
| Y125F                          | Sc-eRF3                            | 7.0%                                | 17.6% | 7.6%  | (1)                       | <b>2.5</b> | 1.1        |
|                                | Hs-eRF3c                           | 7.1%                                | 20.8% | 10.2% | (1)                       | <b>2.9</b> | 1.4        |
| C127A                          | Sc-eRF3                            | 15.8%                               | 15.9% | 8.8%  | <b>1.8</b>                | 1.8        | (1)        |
|                                | Hs-eRF3c                           | 22.4%                               | 19.7% | 12.0% | <b>1.9</b>                | 1.6        | (1)        |

\*1. Wild type and mutant Hs-eRF1s were expressed from the p416GPD (URA3 marker) expression vector in the case of “Sc-eRF3” or from the p415GPD (LEU2 marker) in the case of “Hs-eRF3c” and “+paromomycin (with Hs-eRF3c)”. See Table S2 for wild type Hs-eRF1

\*2. The assay strains S13-I01, I03, I05, I07 (for additional condition; Sc-eRF3c), SKY106-109 (for additional condition; Hs-eRF3c), SKY143-146 (for additional condition; paromomycin) were used.

\*3. Readthrough frequencies are indicated as the mean from three independent measurements.

\*4. Sc-eRF3 is expressed from the endogenous wild type SUP35 gene in the strains S13-I01, I03, I05, and I07.

\*5. Hs-eRF3 is expressed from the p416GPD (URA3 marker) expression vector. The endogenous Sc-eRF3 is downregulated in the presence of tetracycline (150 mM).

\*6 Fold-changes to selected stop codon, shown as (1), are rounded to the first decimal place.

\*7. Values cited in Fig.3CD are shown in boldface.

**Table S6**  
**Readthrough frequencies of selected Sc-eRF1 L123 mutants**

| eRF1 Mutation <sup>*1</sup> | Additional condition <sup>*1</sup> | Readthrough frequency <sup>*2</sup> |        |         | Fold-change <sup>*3</sup> |            |            |
|-----------------------------|------------------------------------|-------------------------------------|--------|---------|---------------------------|------------|------------|
|                             |                                    | UAA                                 | UAG    | UGA     | UAA                       | UAG        | UGA        |
| WT                          | (-paromomycin)                     | (2.6%)                              | (2.6%) | (2.4%)  | (1)                       | 1.0        | 0.9        |
|                             | +paromomycin                       | 11.0%                               | 13.7%  | 12.2%   | (1)                       | 1.3        | 1.1        |
| L123I                       | (-paromomycin)                     | (3.9%)                              | (3.5%) | (14.4%) | 1.1                       | (1)        | <b>3.7</b> |
|                             | +paromomycin                       | 19.8%                               | 21.3%  | 50.7%   | (1)                       | 1.1        | <b>2.6</b> |
| L123V                       | (-paromomycin)                     | (2.6%)                              | (2.6%) | (7.7%)  | (1)                       | 1.0        | <b>3.0</b> |
|                             | +paromomycin                       | 20.0%                               | 23.0%  | 43.6%   | (1)                       | 1.2        | <b>2.2</b> |
| L123F                       | (-paromomycin)                     | (3.4%)                              | (3.7%) | (1.5%)  | 2.3                       | <b>2.5</b> | (1)        |
|                             | +paromomycin                       | 13.9%                               | 22.6%  | 6.2%    | 2.2                       | <b>3.6</b> | (1)        |
| L123A                       | (-paromomycin)                     | (4.8%)                              | (7.0%) | (2.4%)  | 2.0                       | <b>2.9</b> | (1)        |
|                             | +paromomycin                       | 13.3%                               | 29.9%  | 6.8%    | 2.0                       | <b>4.4</b> | (1)        |
| L123S                       | (-paromomycin)                     | (4.9%)                              | (6.7%) | (2.3%)  | 2.1                       | <b>2.9</b> | (1)        |
|                             | +paromomycin                       | 11.9%                               | 27.1%  | 7.3%    | 1.6                       | <b>3.7</b> | (1)        |

\*1. "-paromomycin": The readthrough frequency data (parenthesized) was cited from Table S1. "-paromomycin": The assay strains SKY81, SKY82, SKY83 and SKY84 harboring either the wild type or mutant Ss-eRF1 expression vectors based on the p415GPD (LEU2 marker) in the presence of paromomycin (+paromomycin [10 mg/ml]).

\*2. Readthrough frequencies are indicated as the mean from three independent measurements.

\*3 Fold-changes to selected stop codon, shown as (1), are rounded to the first decimal place.

\*4. Values cited in Fig.3 are shown in boldface.



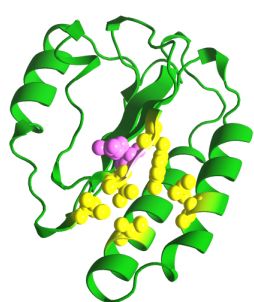

apo-  
A. pernix aRF1  
(3AGK)

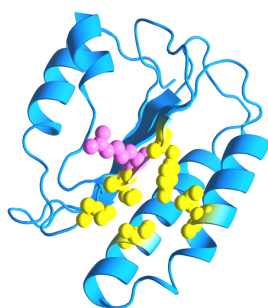

aEF1α bound  
A. pernix aRF1  
(3VMF)

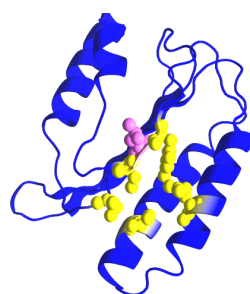

apo-  
Human eRF1  
(1DT9)

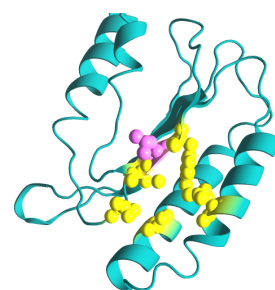

eRF3 bound  
human eRF1  
(3E1Y)

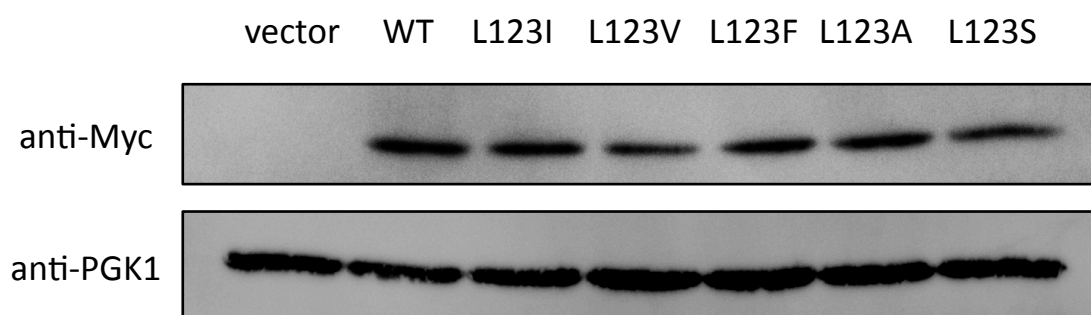

Supplement: supp_gkv376_nar-00601-z-2015-File008.pdf [file supp_gkv376_nar-00601-z-2015-File008.pdf]
